1

# 2 Spatial cell firing during virtual navigation of 3 open arenas by head-restrained mice

4 Guifen Chen<sup>12\*</sup>, John A King<sup>3\*</sup>, Yi Lu<sup>12\*</sup>, Francesca Cacucci<sup>2#</sup>, Neil Burgess<sup>14#</sup>

5 1 UCL Inst of Cognitive Neuroscience, University College London, 17 Queen Square, London WC1N  
6 3AZ, UK.

7 2 Dept. of Neuroscience Physiology & Pharmacology, University College London, Gower Street,  
8 London, WC1E 6BT

9 3 Dept. Clinical Educational Health Psychology, University College London, Gower Street, London,  
10 WC1E 6BT

11 4 UCL Inst of Neurology, University College London, Queen Square, London WC1N 3BG, UK.

12 \* equal contribution

13 # correspondence to [f.cacucci@ucl.ac.uk](mailto:f.cacucci@ucl.ac.uk) or [n.burgess@ucl.ac.uk](mailto:n.burgess@ucl.ac.uk)

14

## 15 Abstract

16 We present a mouse virtual reality (VR) system which restrains head-movements to horizontal  
17 rotations, potentially compatible with multi-photon imaging. We show that this system allows  
18 expression of the spatial navigational behaviour and neuronal firing patterns characteristic of real  
19 open arenas (R). Place and grid, but not head-direction, cell firing had broader spatial tuning in VR  
20 than R. Theta frequency increased less with running speed in VR than in R, while firing rates  
21 increased similarly in both. Place, but not grid, cell firing was more directional in VR than R. These  
22 results suggest that the scale of grid and place cell firing patterns, and the frequency of theta, reflect  
23 translational motion inferred from both virtual (visual and proprioceptive) cues and uncontrolled  
24 static (vestibular translation and extra-maze) cues, while firing rates predominantly reflect visual and  
25 proprioceptive motion. They also suggest that omni-directional place cell firing in R reflects local-  
26 cues unavailable in VR.

## 27 Introduction

28 Virtual reality (VR) offers a powerful tool for investigating spatial cognition, allowing experimental  
29 control and environmental manipulations that are impossible in the real world. For example,  
30 uncontrolled real-world cues cannot contribute to determining location within the virtual  
31 environment, while the relative influences of motoric movement signals and visual environmental  
32 signals can be assessed by decoupling one from the other<sup>1,2</sup>. In addition, the ability to study (virtual)  
33 spatial navigation in head-fixed mice allows the use of intracellular recording and two photon  
34 microscopy<sup>3-12</sup>. However, the utility of these approaches depends on the extent to which the neural  
35 processes in question can be instantiated within the virtual reality (for a recent example of this  
36 debate see<sup>13</sup>).

37 The modulation of firing of place cells or grid cells along a single dimension, such as distance  
38 travelled along a specific trajectory or path, can be observed as virtual environments are explored by  
39 head-fixed mice<sup>2-4,6-9,12</sup> or body-fixed rats<sup>14-16</sup>. However, the two-dimensional firing patterns of place,  
40 grid and head-direction cells in real world open arenas are not replicated in these systems, in which  
41 the animal cannot physically rotate through 360°.

42 By contrast, the two-dimensional spatial firing patterns of place, head direction, grid and border cells  
43 have been observed in VR systems in which rats can physically rotate through 360°<sup>17,18</sup>. Minor  
44 differences with free exploration remain, e.g. the frequency of the movement-related theta rhythm  
45 is reduced<sup>17</sup>, perhaps due to the absence of translational vestibular acceleration signals<sup>14,30</sup>.  
46 However, the coding of 2-d space by neuronal firing can clearly be studied. These VR systems  
47 constrain a rat to run on top of an air-suspended Styrofoam ball, wearing a “jacket” attached to a  
48 jointed arm on a pivot. This allows the rat to run in any direction, its head is free to look around  
49 while its body is maintained over the centre of the ball.

50 However, these 2-d VR systems retain a disadvantage of the real-world freely moving paradigm in  
51 that the head movement precludes use with multi-photon microscopy or intracellular recording. In  
52 addition, some training is required for rodents to tolerate wearing a jacket. Here we present a VR  
53 system for mice in which a chronically implanted head-plate enables use of a holder that constrains  
54 head movements to rotations in the horizontal plane while the animal runs on a Styrofoam ball.  
55 Screens and projectors project a virtual environment in all horizontal directions around the mouse,  
56 and onto the floor below it, from a viewpoint that moves with the rotation of the ball, following<sup>17,18</sup>.  
57 See Figure 1 and Materials and Methods.

58 We demonstrate that this system allows navigation to an unmarked location within an open arena,  
59 showing that mice can perceive and remember locations defined by the virtual space. We also show  
60 that the system allows expression of the characteristic 2-dimensional firing patterns of place cells,  
61 head-direction cells and grid cells in electrophysiological recordings, making their underlying  
62 mechanisms accessible to investigation by manipulations of the VR.

## 63 **Results**

### 64 **Navigation in VR**

65 Eleven mice were trained in the virtual reality system (see Figure 1 and Materials and Methods). All  
66 training trials in the VR and the real square environments from the 11 mice were included in the  
67 behavioural analyses below. The mice displayed an initially lower running speed when first  
68 experiencing the real-world recording environment (a 60x60cm square), but reached a higher  
69 average speed after 20 or so training trials. The increase in running speed with experience was  
70 similar in the virtual environments (Figure 1F-H). Running speeds did not differ between the 60cm  
71 and 90cm virtual environments used for recording in 7 and 4 of the mice respectively ( $12.01 \pm 2.77$  in  
72 60cm VR,  $14.33 \pm 4.19$  cm/s in 90cm VR,  $p = 0.29$ ). Running directions in the VR environment showed a  
73 marginally greater unimodal bias compared to the real environment (R; Figure 1K). Mice displayed a  
74 greater tendency to run parallel to the four walls in VR, a tendency which reduced with experience  
75 (Figure S2). They also took straighter, less tortuous, paths in VR than in R, as would be expected from  
76 their head-fixation (Figure 1L-N).

77

78

79

Figure 1. Virtual reality setup and behaviour within it.

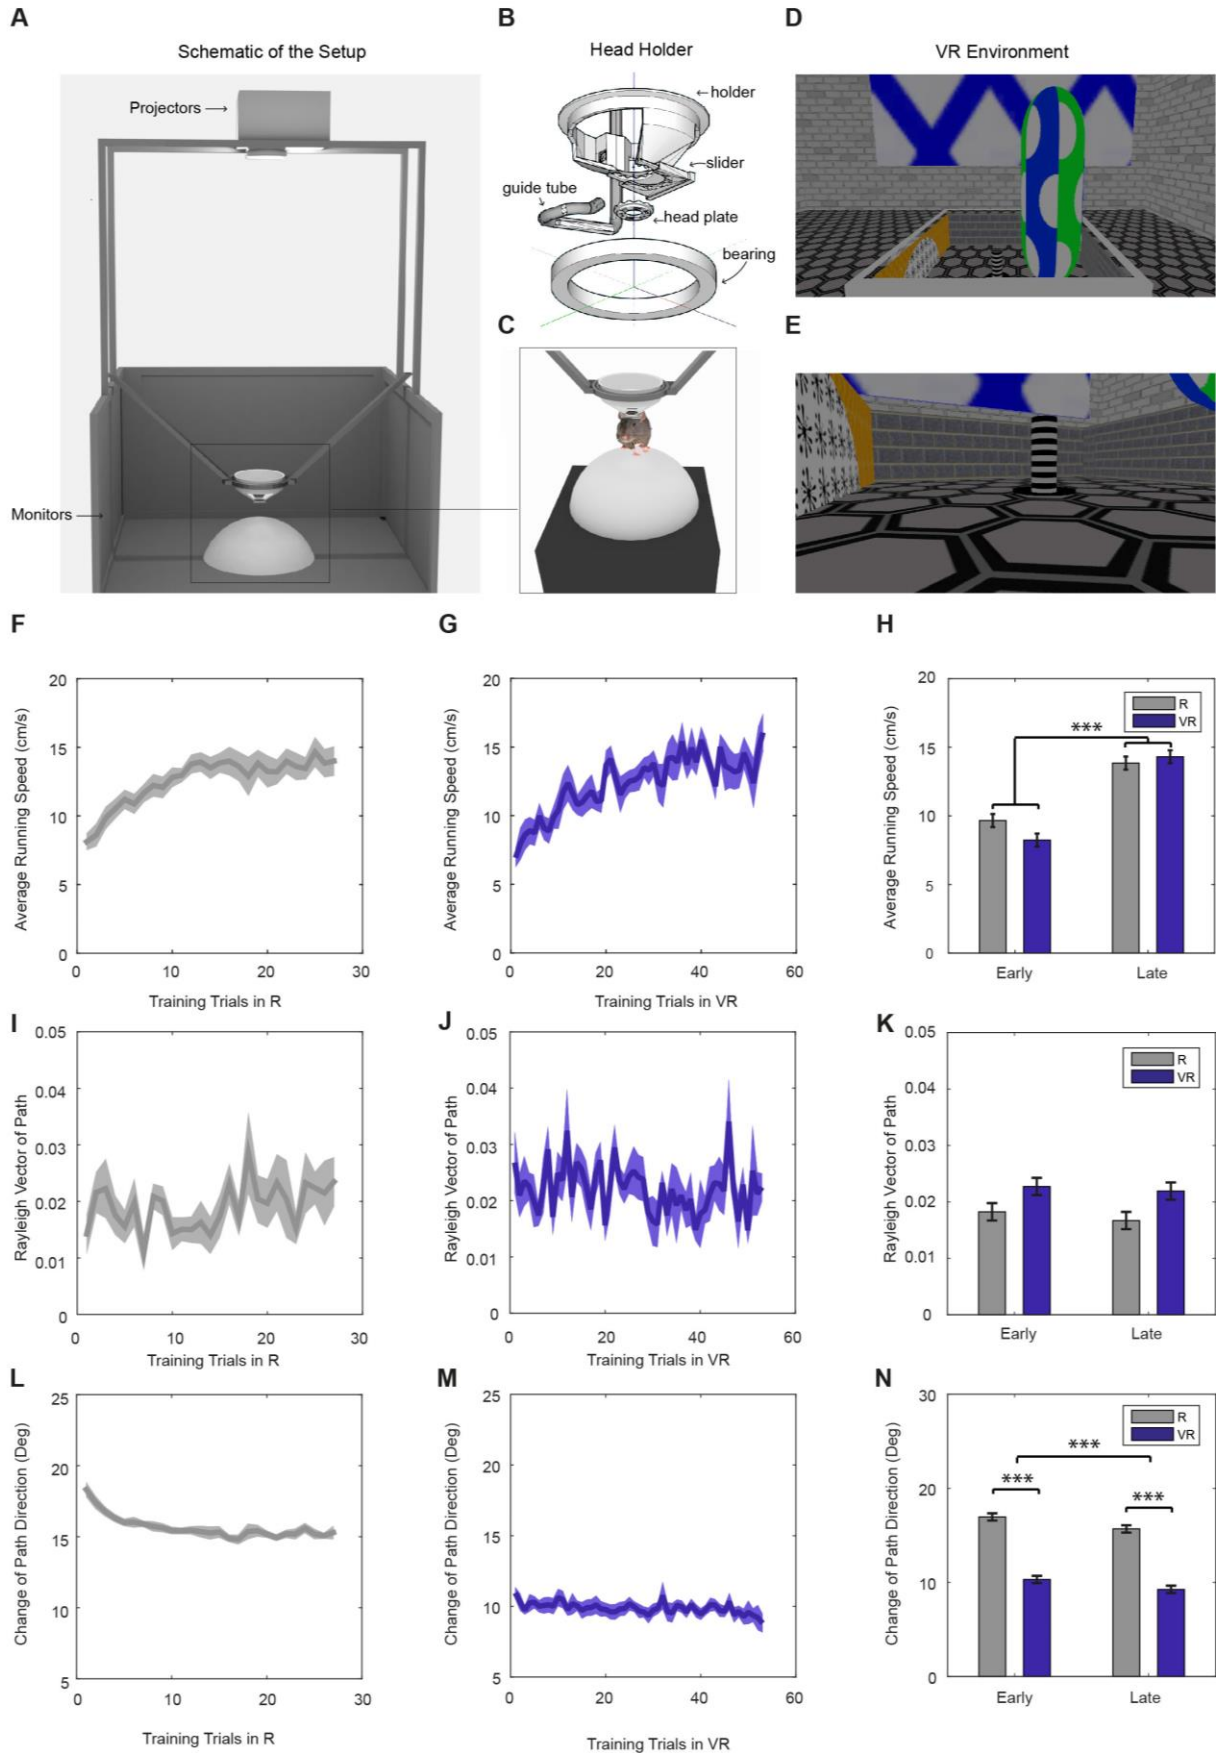

81 *Figure 1. Virtual reality setup and behaviour within it. (A) Schematic of the VR setup. (B) A rotating*  
 82 *head-holder. (C) A mouse attached to the head-holder. (D-E) Side views of the VR environment. (F-G)*  
 83 *Average running speeds of all trained mice (n=11) across training trials in R (F) and VR (G)*  
 84 *environments. (H) Comparisons of the average running speeds between the first 5 trials and the last*  
 85 *5 trials in both VR and R environments, showing a significant increase in both (n=11, p<0.001,*  
 86 *F(1,10)=40.11). (I-J) Average Rayleigh vectors of running direction across training trials in R (I) and VR*  
 87 *(J). (K) Comparisons of the average Rayleigh vectors of running direction between the first 5 trials*  
 88 *and the last 5 trials in both VR and R. Directionality was marginally higher in VR than in R (n=11,*  
 89 *p=0.053, F(1,10)=4.82) and did not change significantly with experience. (L-M) Average changes of*  
 90 *running direction (absolute difference in direction between position samples) across training trials in*  
 91 *R (L) and VR (M). (N) Comparisons of the changes of running direction between the first 5 and last 5*  
 92 *trials in both R and VR. Animals took straighter paths in VR than R (n=11, p<0.001, F(1,10)=300.93),*  
 93 *and paths became straighter with experience (n=11, p<0.001, F(1,10)=26.82). Positions were*  
 94 *sampled at 2.5Hz with 400ms boxcar smoothing in (I-N).*

95

96 In the fading beacon task, performance steadily improved across 2-3 weeks of training (Figure 2D,  
 97 one trial per day). They learned to approach the fixed reward location and could do so even after it  
 98 became completely unmarked (fully faded, see Figure 2 and the Supplementary video of a mouse  
 99 performing the task, and Materials and Methods for details of the training regime).

Figure 2. Performance on the 'fading beacon' task.

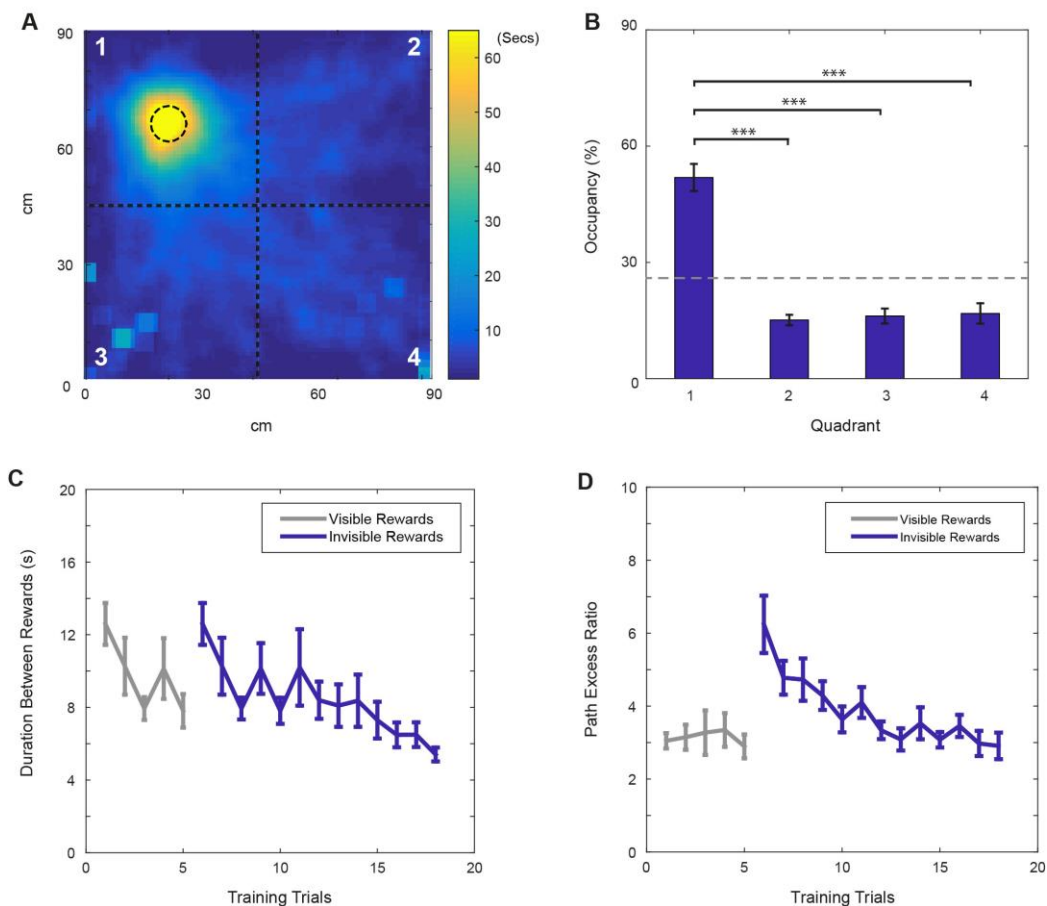

100

101 *Figure 2. Performance on the ‘fading beacon’ task. (A) An example heat map showing the distribution*  
102 *of locations during a 40-min trial (mouse#987, trial#24). The dotted circle in the 1<sup>st</sup> quadrant shows*  
103 *the location of the faded reward. (B) Average time spent (as % of total time) in each quadrant of the*  
104 *square (numbered in A) showed a clear bias ( $n=11$ ,  $p < 0.001$ ,  $F(3,30) = 39.03$ ), with time spent in the*  
105 *1<sup>st</sup> quadrant was significantly higher than in the others (\*\*\*) denotes significance at  $p < 0.001$ , \*\* at*  
106  *$p < 0.01$ ). (C) Average durations between the 3<sup>rd</sup> and the 4<sup>th</sup> rewards across training trials. (D) Average*  
107 *path excess ratios between the 3<sup>rd</sup> and the 4<sup>th</sup> rewards across training trials (means  $\pm$  s.e.m). Note*  
108 *that in each set of four rewards, the 1<sup>st</sup>, 2<sup>nd</sup> and 3<sup>rd</sup> rewards appeared at random locations in the*  
109 *virtual square, marked by visual beacons, the 4<sup>th</sup> reward was located at a fixed location. Grey lines*  
110 *show trials when the fixed-location rewards were marked by visual beacons. Blue lines show trials*  
111 *when the fixed rewards were not marked. See Supplementary video.*

112

### 113 Electrophysiology

114 We recorded a total of 231 CA1 cells from 7 mice: 175 cells were classified as place cells in the real  
115 environment, 186 cells in the virtual environment, and 154 cells were classified as place cells in both  
116 real and virtual environments (see Materials and Methods).

117 We recorded 141 cells in dorsomedial Entorhinal Cortex (dmEC) from 8 mice, 82 of them were  
118 classified as grid cells in the real environment, 65 of them were grid cells in the virtual environment,  
119 and 61 were classified as grid cells in both real and virtual environments. Among these 141 recorded  
120 cells, 16 cells were quantified as head-direction cells (HDCs) in R, 20 cells were HDCs in VR, with 12  
121 cells classified as HDCs in both R and VR environments.

122 Place cells recorded from CA1 showed spatially localised firing in the virtual environment, with  
123 similar firing rates in the virtual and real square environments. Place cells had larger firing fields in  
124 VR than in R, by a factor 1.44 (field size in VR/ field size in R), which did not differ between those  
125 recorded in a 60x60cm versus a 90x90cm VR environment (1.44 in 90cm, 1.43 in 60cm,  $p=0.66$ ). The  
126 spatial information content of firing fields in VR was lower than in R. In addition, the firing of place  
127 cells was more strongly directionally modulated in VR than in R. See Figure 3.



Figure 3. Place cell firing in real and virtual environments.

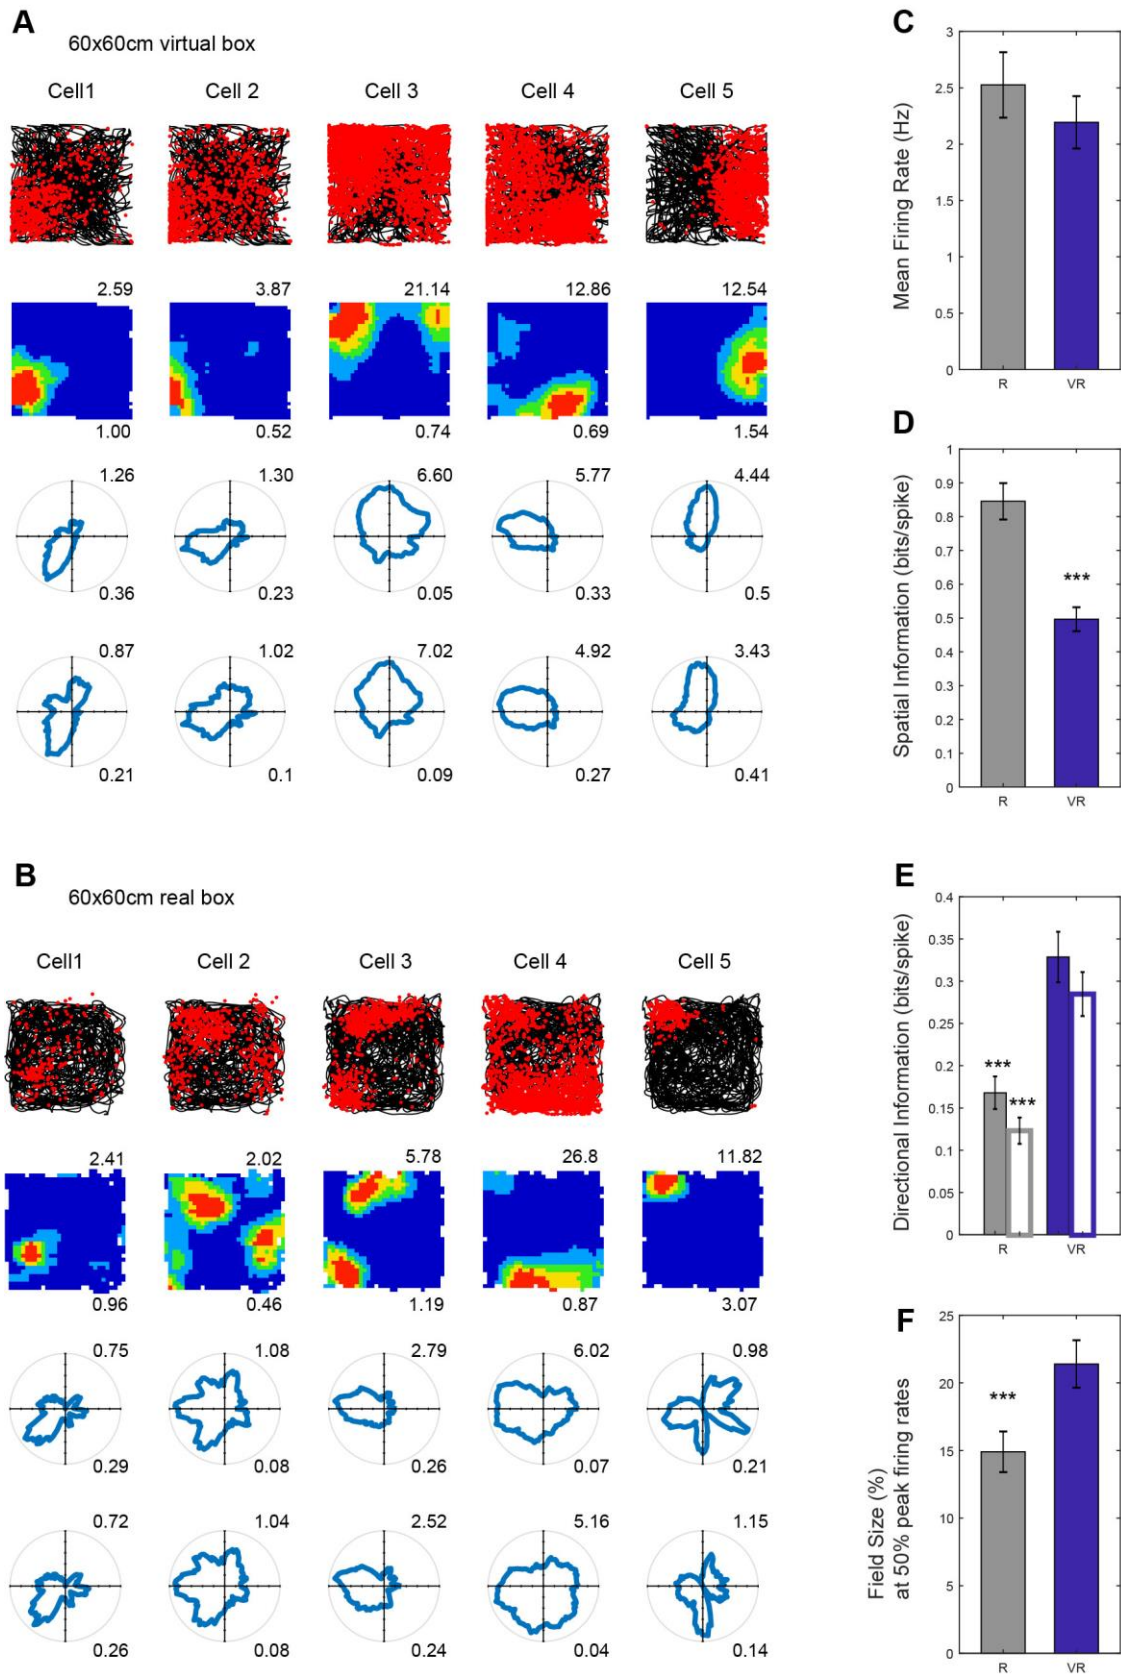

128

129

130

Figure 3. Place cell firing in real and virtual environments. (A-B) Five place cells simultaneously-recorded in a 60x60cm virtual square (A) and in a 60x60cm real square (B, one cell per column). Top

131 row: 40-min running trajectory (black line) with red dots showing the locations of spikes; 2nd row,  
132 firing rate maps, maximum firing rate (Hz) shown at top right, spatial information rate(bits/spike)  
133 bottom right; 3<sup>rd</sup> and 4<sup>th</sup> row: polar plots of directional firing rates (3<sup>rd</sup> row: standard binning; 4<sup>th</sup> row:  
134 after fitting a joint 'pxd' model to account for inhomogeneous sampling), maximum firing rate shown  
135 at top right, directional information bottom right. (C) Comparison of mean firing rates. There was no  
136 significant difference between R and VR ( $n=154$ ,  $t(153)=1.67$ ,  $p=0.10$ ). (D) Comparison of spatial  
137 information rates. Rates were significantly higher in R than in VR ( $n=154$ ,  $t(153)=8.90$ ,  $p<0.001$ ). (E)  
138 Comparison of directional information rates using standard (solid bars) and pxd binning (open bars).  
139 Place cells were more directional in VR than in R (standard  $n=154$ ,  $t(153)=6.45$ ,  $p<0.001$ ; pxd,  $n=154$ ,  
140  $t(153) = 7.61$ ,  $p<0.001$ ). (F) Comparison of field sizes between R and VR. The place fields included  
141 location bins with spikes higher than 50% of peak firing rates. Field sizes were calculated based on  
142 their proportion to the size of the test squares. The field sizes were bigger in VR than in R ( $n=154$ ,  
143  $t(153)=4.38$ ,  $p<0.001$ ). Blue bars indicate results from VR trials, grey bars indicate R trials.

144

145 One possible contribution to apparent directionality in firing could be inhomogeneous sampling of  
146 direction within the (locational) firing field. This can be controlled for by explicitly estimating the  
147 parameters of a joint place and direction ('pxd') model from the firing rate distribution<sup>24</sup>. However,  
148 using this procedure did not ameliorate the directionality in firing (see Figure 3). Further analyses  
149 showed that firing directionality increased near to the boundaries in both virtual and real  
150 environments (where sampling of direction is particularly inhomogeneous), but that the additional  
151 directionality in VR compared to R was apparent also away from the boundaries. See Figure S3.

152 Grid cells recorded in dmEC, showed similar grid-like firing patterns in VR as in R, with similar firing  
153 rates and 'gridness' scores. The spatial scale of the grids was larger in VR than in R, with an average  
154 increase of 1.42 (grid scale in VR/ grid scale in R,  $n=6$  mice), which did not differ between those  
155 recorded in a 60x60cm versus a 90x90cm VR environment (1.43 in 60cm VR, 1.36 in 90cm VR,  
156  $p=0.78$ ). The spatial information content of grid cell firing was lower in VR than R, as with the place  
157 cells. Unlike the place cells, the grid cells showed only a slight increase in directionality from R to VR,  
158 which, unlike for place cells, appears to reflect inhomogeneous sampling of directions within firing  
159 fields, as the effect was not seen when controlling for this in a joint 'pxd' model. See Figure 4. It is  
160 possible that low directional modulation of the firing of a grid cell could reflect directionally  
161 modulated firing fields with different directional tuning. Accordingly we checked the directional  
162 information in the firing of each field, without finding any difference between R and VR (Figure 4H).

Figure 4 Grid cell firing in real and virtual environments.

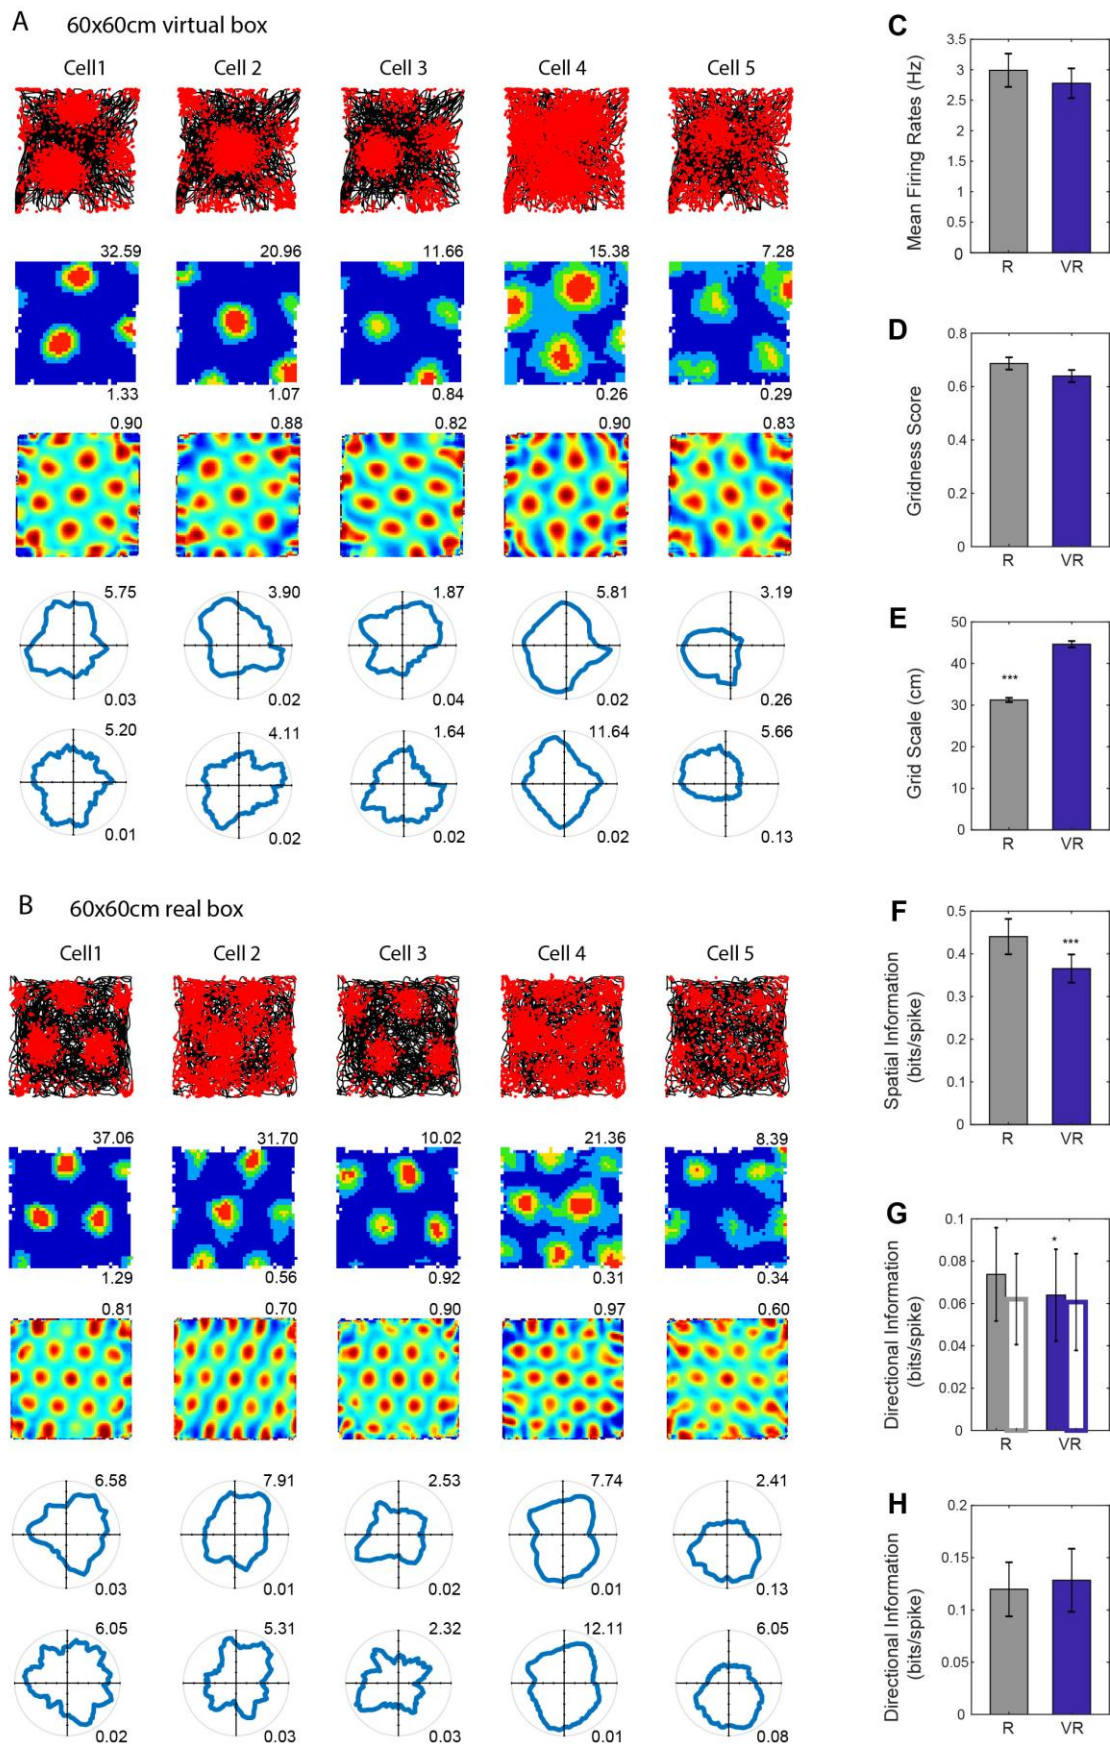



164 *Figure 4 Grid cell firing in real and virtual environments. (A-B) Five grid cells simultaneously-recorded*  
165 *in a 60x60cm virtual square (A) and in a 60x60cm real square (B, one cell per column). Top row: 40-*  
166 *min running trajectory (black line) with red dots showing the locations of spikes; 2nd row, firing rate*  
167 *maps, maximum firing rate (Hz) shown at top right, spatial information (bits/spike) bottom right; 3<sup>rd</sup>*  
168 *row: spatial autocorrelation maps, numbers on the top right show gridness scores; 4<sup>th</sup> and 5<sup>th</sup> rows:*  
169 *polar plots of directional firing rates (4<sup>th</sup> row: standard binning; 5<sup>th</sup> row: after fitting a joint ‘pxd’*  
170 *model to account for inhomogeneous sampling), maximum firing rate shown at top right, directional*  
171 *information bottom right. (C) Comparison of mean firing rates. There was no significant difference*  
172 *between R and VR ( $n=61$ ,  $t(60)=1.71$ ,  $p=0.09$ ). (D) Comparison of gridness scores, higher in R than VR*  
173 *but not significantly so ( $n=61$ ,  $t(60)=1.67$ ,  $p=0.10$ ). (E) Comparison of grid scales, showing*  
174 *significantly larger scales in VR than in R ( $n=61$ ,  $t(60)=15.52$ ,  $p<0.001$ ). (F) Comparison of spatial*  
175 *information in bits/spike, which was significantly higher in R than VR ( $n=61$ ,  $t(60)=4.12$ ,  $p<0.001$ ). (G)*  
176 *Comparison of directional information. Grid fields tended to be slightly more directional in VR than in*  
177 *R ( $n=61$ ,  $t(60)=2.04$ ,  $p<0.05$ ), although the bias disappeared when the rates were calculated based on*  
178 *pxd plots (open bars,  $n=61$ ,  $t(60)=0.32$ ,  $p=0.75$ ). (H) Comparison of directional information in*  
179 *individual firing fields. There was no significant difference between the R and VR trials based on pxd*  
180 *plots ( $n=61$ ,  $t(60)=0.53$ ,  $p=0.60$ ). Blue bars indicate results from VR trials, grey bars indicate R trials.*

181

182 We also recorded head-direction cells in the dmEC, as previously reported in rats<sup>21</sup> and mice<sup>25</sup>. These  
183 cells showed similar firing rates in VR and R, with similar tuning widths. See Figure 5. The relative  
184 differences in the tuning directions of simultaneously recorded head-direction cells was maintained  
185 between R and VR, even though the absolute tuning direction was not (see Figure S4).

186

Figure 5. Head direction cell firing in real and virtual environments.

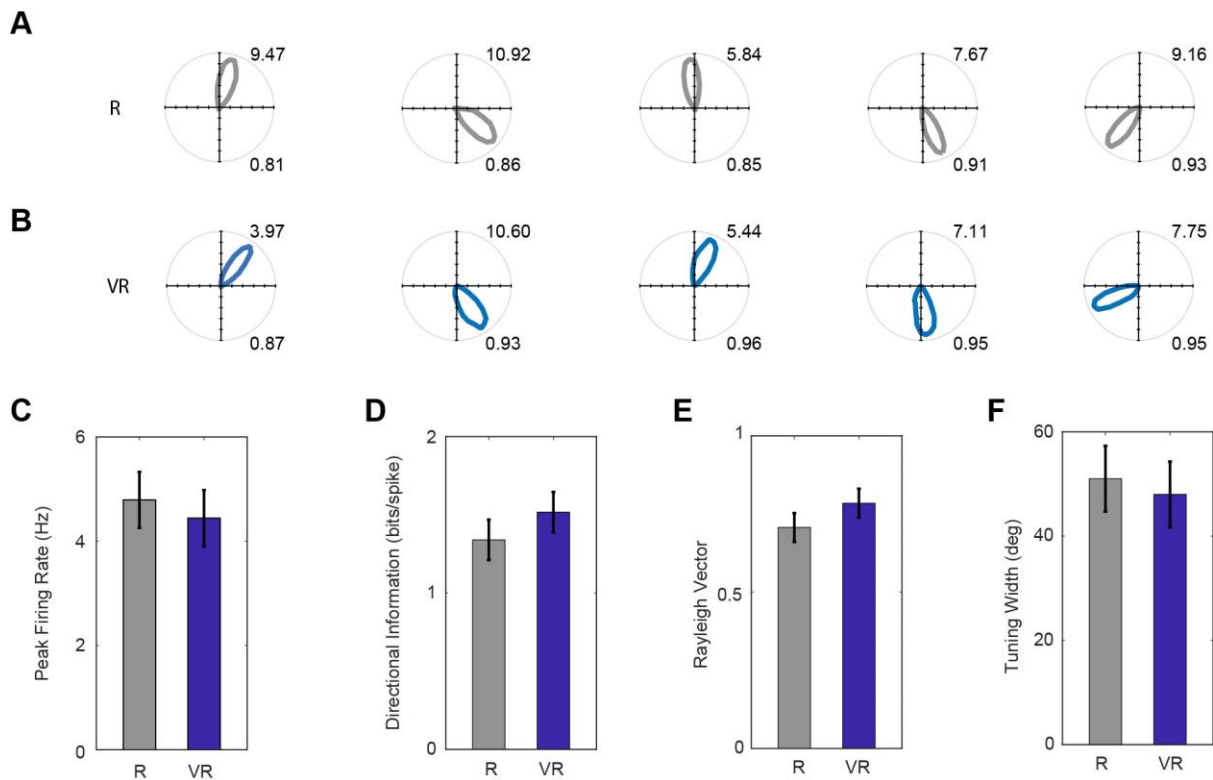

187

188 *Figure 5. Head direction cell firing in real and virtual environments. (A-B) Polar plots of five*  
 189 *simultaneously recorded HD cells in dmEC in VR (A) and R (B, one cell per column). Maximum firing*  
 190 *rates are shown top right, Rayleigh vector length bottom right. (C-F) Comparisons of basic properties*  
 191 *of HD cells in dmEC between R and VR. There were no significant differences in peak firing rates ( $t(11)$*   
 192 *= 0.65,  $p = 0.53$ ; C); spatial information rate ( $t(11)=1.38, p=0.19$ ; D); Rayleigh vector length*  
 193 *( $t(11)=1.69, p=0.12$ ; E); and tuning width ( $t(11)=0.48, p=0.64$ ; F).*

194

195 The translational movement defining location within the virtual environment purely reflects  
 196 feedback (visual, motoric and proprioceptive) from the virtual reality system, as location within the  
 197 real world does not change. However, the animal's sense of orientation might reflect both virtual  
 198 and real-world inputs, as the animal rotates in both the real and virtual world. To check for the  
 199 primacy of the controlled virtual inputs versus potentially uncontrolled real-world inputs (e.g.  
 200 auditory or olfactory), we performed a 180° rotation of the virtual environment between trials. Note  
 201 that the geometry of the apparatus itself (square configuration of screens, overhead projectors on  
 202 either side) would conflict with rotations other than 180°. In separate trials, we observed a  
 203 corresponding rotation of the virtual firing patterns of place, grid and head-direction cells, indicating  
 204 the primacy of the virtual environment over non-controlled real world cues. See Figure 6.

Figure 6 Effect of rotating the virtual environment on spatial firing patterns.

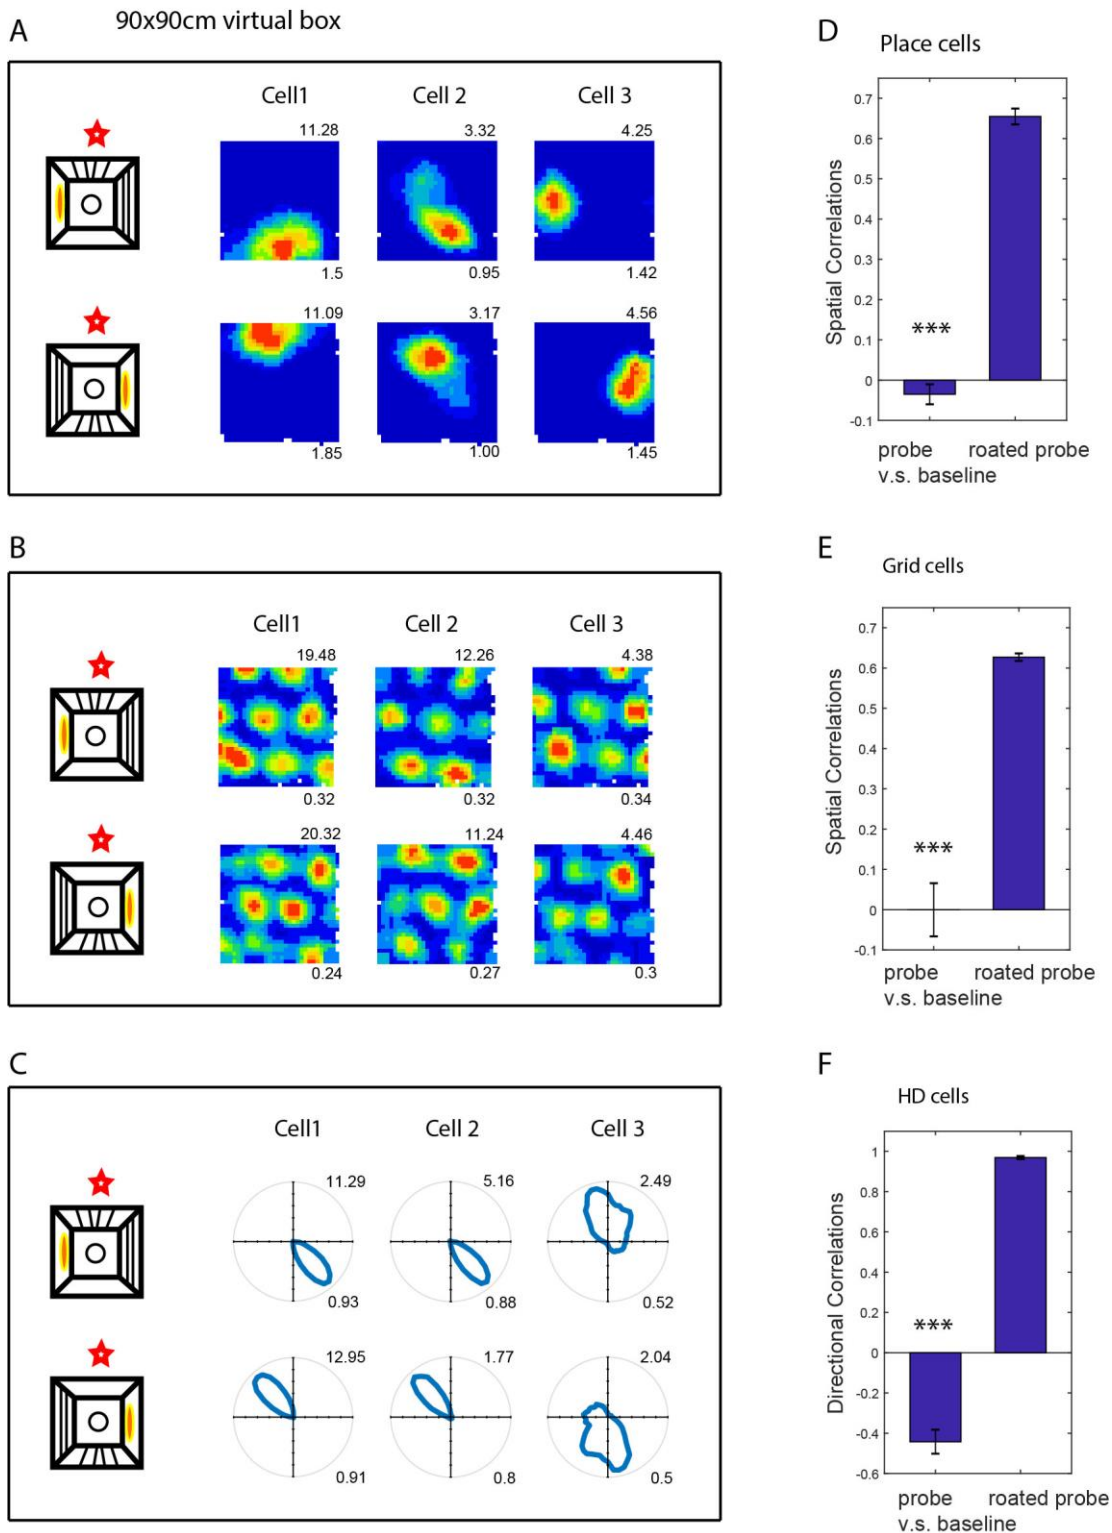

205

206 *Figure 6 Effect of rotating the virtual environment on spatial firing patterns. (A-C) Three*  
 207 *simultaneously recorded CA1 place cells (A), dmEC grid cells (B) and dmEC HD cells (C). The upper*  
 208 *rows are the firing patterns in the baseline trials, and the lower rows are the patterns in the probe*  
 209 *trials. The far-left column shows the schematic of the manipulation: all virtual cues were rotated 180°*  
 210 *relative to the real environment (marked by the red stars). Maximum firing rates are shown top right,*

211 *spatial information (A), gridness (B) or Rayleigh vector length (C) bottom right. (D-F) Spatial*  
212 *correlations between the 180° rotated probe trials and the baseline trials were significantly higher*  
213 *than between the probe trials and the baseline trials (spatial correlations for place cells, n=123,*  
214 *t(122)=19.44, p<0.001; grid cells, n=18, t(17)=9.41, p<0.001; HD cells, n=17, t(16)=24.77, p<0.001).*

215

216 The animal's running speed is known to correlate with the firing rates of cells, including place cells,  
217 grid cells and (by definition) speed cells<sup>21,22,26</sup>, and with the frequency of the local field potential  
218 theta rhythm<sup>27-29</sup>. So these experimental measures can give us an independent insight into perceived  
219 running speed. We found that the slope of the relationship between theta frequency and running  
220 speed was reduced within the VR compared to R, while this was not the case for the firing rates of  
221 place, grid and speed cells. See Figure 7. However, the changes in grid scale and the changes theta  
222 frequency in virtual versus real environments did not correlate with each other significantly across  
223 animals.



Figure 7. Effect of running speed on theta frequency and firing rates in R and VR.

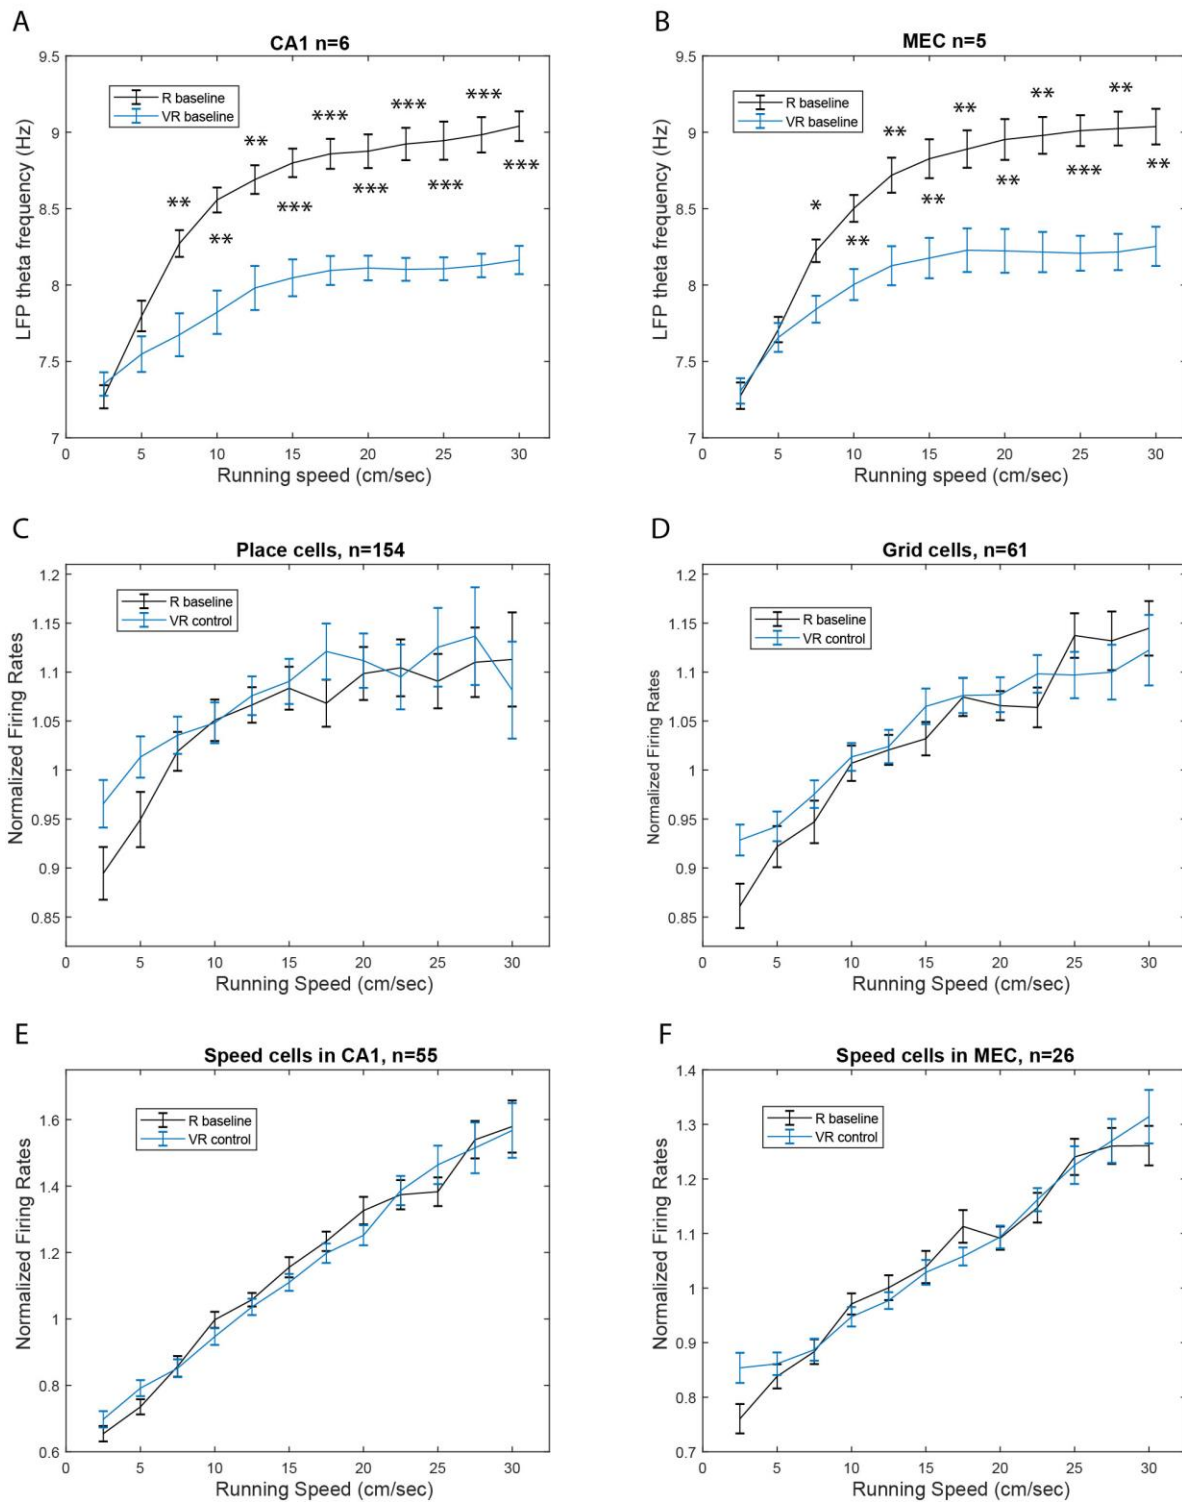

224

225 *Figure 7. Effect of running speed on theta frequency and firing rates in real and virtual environments.*  
 226 *Relationship between running speed in VR (blue) and R (black) on instantaneous LFP theta frequency*  
 227 *in CA1 (A, n=6); instantaneous LFP theta frequency in dmEC (B, n=5); firing rates of place cells in CA1*  
 228 *(C, n=154); firing rates of grid cells in dmEC (D, n=61); speed-modulated cells in CA1 (E, n=55); firing*  
 229 *rates of speed-modulated cells in dmEC (F, n=26). Lines show the mean ( $\pm$  s.e.m) theta frequency in*  
 230 *each running speed bin (2.5cm/s to 30cm/s).*

231

## 232 Discussion

233 We have demonstrated the ability of a novel mouse virtual reality (VR) system to allow expression of  
234 spatial learning and of the characteristic spatially modulated firing patterns of place, grid and head-  
235 direction cells in open arenas. Thus it passes the first pre-requisite as a tool for studying the  
236 mechanisms behind the two dimensional firing patterns of these spatial cells, following previous  
237 systems for rats that also allow physical rotation of the animal<sup>17,18</sup>. Head-fixed or body-fixed VR  
238 systems have been very successful for investigating the one-dimensional spatial firing patterns of  
239 place cells<sup>2-4,12,14-16</sup> or grid cells<sup>6-9</sup>, e.g. modulation of firing rate by the distance along a linear  
240 trajectory. But the two-dimensional firing patterns of place, grid or head direction cells are not seen  
241 in these systems.

242 Although the characteristic firing patterns of spatial cells were expressed within our VR system,  
243 there were also some potentially instructive differences in their more detailed properties between  
244 VR and a similar real environment (R), which we discuss below.

245 The spatial scale of the firing patterns of both place cells and grid cells was approximately 1.4 times  
246 larger in VR compared to R (Figures 3 and 4; see also<sup>17</sup>). Along with the increased scale of place and  
247 grid cell responses in VR, there was a reduction in the dependence of theta frequency on running  
248 speed. The LFP theta frequency reflects a contribution from vestibular translational acceleration  
249 signals<sup>14,30</sup> which will be absent in our VR system. However, there was no change in the increasing  
250 firing rates of place, grid and speed cells with running speed in VR (Figure 7), indicating an  
251 independence from vestibular translational acceleration cues. Thus it is possible that the absence of  
252 linear acceleration signals affects both LFP theta rhythmicity and the spatial scale of firing patterns,  
253 but there was no evidence that the two were directly related.

254 Finally, uncontrolled distal cues, such as sounds and smells, and the visual appearance of the  
255 apparatus aside from the screens (the edge of the ball, the edges of the screens) will conflict with  
256 virtual cues indicating self-motion. Thus increased firing field size could also reflect broader tuning or  
257 reduced precision due to absent or conflicting inputs, consistent with the reduced spatial  
258 information seen in place and grid cell firing patterns (Figures 3 and 4), and potentially a response to  
259 spatial uncertainty<sup>31</sup>.

260 The head direction cells do not show broader tuning in the VR (Figure 5), probably because there is  
261 no absence of vestibular rotation cues and no conflict with distal real-world cues, as the mice rotate  
262 similarly in the virtual and real world. We note however, that spatial firing patterns follow the virtual  
263 cues when the virtual cues and entry point are put into conflict with uncontrolled real-world cues  
264 (Figure 6).

265 Place cell firing in VR showed an increased directionality compared to the real environment. One  
266 possible explanation, that the apparent directionality reflected inhomogeneous sampling of  
267 directions in the firing field, was not supported by further analyses (Figure 3E). A potential benefit of  
268 VR is an absence of local sensory cues to location, as experimenters typically work hard to remove  
269 consistent uncontrolled cues from real-world experiments (e.g., cleaning and rotating the walls and  
270 floor between trials). However, but reliable within-trial local cues may contribute to localisation of  
271 firing nonetheless<sup>14</sup>. Thus it maybe that uncontrolled local cues in real experiments (even if  
272 unreliable from trial to trial) are useful for supporting a locational response that can be bound to the  
273 distinct visual scenes observed in different directions, see also<sup>15</sup>. In this case, by removing these local

274 cues, the use of VR leaves the locational responses of place cells more prone to modulation by the  
275 remaining (directionally specific) visual cues. We note that grid cells did not show such an increase in  
276 directional modulation as the place cells. This may indicate that place cell firing is more influenced  
277 by environmental sensory inputs - and thus directional visual inputs given the absence of local cues,  
278 while grid cell firing might be more influenced by self-motion cues, and thus less dependent on local  
279 cues for orientation independence. However, this would need to be verified in future work.

280 In conclusion, by using VR, the system presented here offers advantages over traditional paradigms  
281 by enabling manipulations that are impossible in the real-world, allowing visual projection of an  
282 environment that need not directly reflect a physical reality or the animals' movements. Differences  
283 between the firing patterns in VR and R suggest broader spatial tuning as a possible response to  
284 under-estimated translation or spatial uncertainty caused by missing or conflicting inputs, a role for  
285 local cues in supporting directionally independent place cell firing and potentially for self-motion  
286 cues in supporting directionally independent grid cell firing. Finally, the differential effects of moving  
287 from R to VR on the dependence on running speed of the LFP theta frequency compared to neuronal  
288 firing rates suggests distinct mechanisms for speed coding, potentially reflecting a differential  
289 dependence on vestibular translational acceleration cues.

290 Previous body-rotation VR systems for rats<sup>17,18</sup> also allow expression of the two dimensional firing  
291 patterns of place, grid and head-direction cells. However, by working for mice and by constraining  
292 the head to rotation in the horizontal plane, our system has the potential for future use with multi-  
293 photon imaging using genetically encoded calcium indicators. The use of multiple screens and floor  
294 projectors is not as elegant as the single projector systems<sup>17,18</sup> but allows the possible future  
295 inclusion of a two photon microscope above the head without interrupting the visual projection,  
296 while the effects of in-plane rotation on acquired images should in principle be correctable in  
297 software.

## 298 **Materials and Methods**

### 299 **Virtual Reality**

300 A circular head-plate made of plastic (Stratasys Endur photopolymer) is chronically attached to the  
301 skull, with a central opening allowing the implant of tetrodes for electrophysiological recording (see  
302 Surgery). The head-plate makes a self-centring joint with a holder mounted in a bearing (Kaydon  
303 reali-slim bearing KA020XP0) and is clipped into place by a slider. The bearing is held over the centre  
304 of an air-supported Styrofoam ball. Four LCD screens placed vertically around the ball and two  
305 projectors onto a horizontal floor provide the projection of a virtual environment. The ball is  
306 prevented from yaw rotation to give the mouse traction to turn and to prevent any rotation of the  
307 ball about its vertical axis, following<sup>17</sup>. See Figure 1A-E.

308 The virtual environment runs on a Dell Precision T7500 workstation PC running Windows 7 64-bit on  
309 a Xeon X5647 2.93GHz CPU, displayed using a combination of four Acer B236HL LCD monitors  
310 mounted vertically in a square array plus two LCD projectors (native resolution 480x320, 150  
311 lumens) mounted above to project floor texture. The head-holder is at the centre of the square and  
312 60mm from the bottom edge of the screens, and 9500mm below the projectors. The LCD panels are  
313 514mm x 293mm, plus bezels of 15mm all around. These six video feeds are fed by an Asus AMD  
314 Radeon 6900 graphics card and combined into a single virtual display of size 5760x2160px using  
315 AMD Radeon Eyefinity software. The VR is programmed using Unity3d v5.0.2f1 which allows virtual  
316 cameras to draw on specific regions of the virtual display, with projection matrices adjusted (see  
317 Kooima, 2008 <http://csc.lsu.edu/~kooima/articles/genperspective/index.html>) to the physical

318 dimensions and distances of the screens and to offset the vanishing point from the centre. For  
319 example, a virtual camera facing the X-positive direction renders its output to a portion of the virtual  
320 display which is known to correspond to the screen area of the physical monitor facing the X-  
321 negative direction.

322 Translation in the virtual space is controlled by two optical mice (Logitech G700s gaming mouse)  
323 mounted with orthogonal orientations at the front and side of a 200mm diameter hollow  
324 polystyrene sphere, which floats under positive air pressure in a hemispherical well. The optical mice  
325 drive X and Y inputs respectively by dint of their offset orientations, and gain can be controlled  
326 within the Unity software. Gain is adjusted such that real-world rotations of the sphere are  
327 calibrated so that a desired environmental size (e.g. 600mm across) corresponds to the appropriate  
328 movement of the surface of the sphere under the mouse (i.e. moving 600mm, or just under one  
329 rotation, on the sphere takes the mouse across the environment). Mouse pointer acceleration is  
330 disabled at operating system level to ensure movement of the sphere is detected in a linear fashion  
331 independent of running speed.

332 The mouse is able to freely rotate in the horizontal plane, which has no effect on the VR display (but  
333 brings different screens into view). Rotation is detected and recorded for later analysis using an  
334 Axona dacqUSB tracker which records the position of two LEDs mounted at ~25mm offset to left and  
335 right of the head stage amplifier (see Surgery). Rotation is sampled at 50Hz by detection of the LED  
336 locations using an overhead video camera, while virtual location is sampled and logged at 50Hz.

337 Behaviour is motivated by the delivery of milk rewards (SMA, Wysoy) controlled by a Labjack U3HD  
338 USB Data Acquisition device. A digital-to-analogue channel applies 5V DC to a control circuit driving a  
339 12V Cole-Parmer 1/16" solenoid pinch valve, which is opened for 100ms for each reward, allowing  
340 for the formation of a single drop of milk (5 $\mu$ L) under gravity feed at the end of a 1/32" bore tube  
341 held within licking distance of the animal's mouth.

342 Control of the Labjack and of reward locations in the VR is via UDP network packets between the VR  
343 PC and a second experimenter PC, to which the Labjack is connected by USB. Software written in  
344 Python 2.7 using the Labjack, tk (graphics) and twistd (networking) libraries provide a plan-view  
345 graphical interface in which the location of the animal and reward cues in the VE can be easily  
346 monitored and reward locations manipulated with mouse clicks. See Figure 1.

## 347 Animals

348 Subjects (11 C57Bl/6 mice) were aged 11-14 weeks and weighed 25-30 grams at the time of surgery.  
349 Mice were housed under 12:12 inverted light-dark cycle, with lights on at 10am. All work was carried  
350 out under the Animals (Scientific Procedures) Act 1986 and according to Home Office and  
351 institutional guidelines.

## 352 Surgery

353 Throughout surgery, mice were anesthetized with 2-3% isoflurane in O<sub>2</sub>. Analgesia was provided pre-  
354 operatively with 0.1mg/20g Carprofen, and post-operatively with 0.1mg/20g Metacam. Custom-  
355 made head plates were affixed to the skulls using dental cement (Kemdent Simplex Rapid). Mice  
356 were implanted with custom-made microdrives (Axona, UK), loaded with 17  $\mu$ m platinum-iridium  
357 tetrodes, and providing buffer amplification. Two mice were implanted with 8 tetrodes in CA1 (ML:  
358 1.8mm, AP: 2.1mm posterior to bregma), three mice with 8 tetrodes in the dorsomedial entorhinal  
359 cortex (dmEC, ML = 3.1mm. AP = 0.2 mm anterior to the transverse sinus, angled 4° posteriorly), and  
360 six mice received a dual implant with one microdrive in right CA1 and one in left dmEC (each



361 microdrive carried 4 tetrodes). After surgery, mice were placed in a heated chamber until fully  
362 recovered from the anaesthetic (normally about 1 h), and then returned to their home cages. Mice  
363 were given at least 1 week of post-operative recovery before cell screening and behavioural training  
364 started.

## 365 Behavioural Training

366 Behavioural training in the virtual reality setup started while tetrodes were approaching target brain  
367 areas (see Screening for spatial cells). Behavioural training involved four phases. Firstly, mice  
368 experienced an infinitely long 10cm-wide virtual linear track, with 5  $\mu$ L milk drops delivered as  
369 rewards. Reward locations were indicated by virtual beacons (high striped cylinders with a black  
370 circular base, see Figure S1A), which were evenly placed along the track (see Figure S1C). When the  
371 mouse contacted the area of the base, milk was released and the beacon disappeared (reappearing  
372 in another location). The lateral movement of the mice was not registered in this phase. The aim of  
373 this training phase was to habituate the mice to being head restrained and train them to run  
374 smoothly on the air-cushioned ball. It took three days, on average, for mice to achieve this criterion  
375 and move to the next training phase.

376 During the second training phase mice experienced a similar virtual linear track (see Figure S1B),  
377 which was wider than the first one (30cm wide). During this phase, reward beacons were evenly  
378 spaced along the long axis of the track, as before, but placed pseudo-randomly in one of three pre-  
379 defined positions on the lateral axis (middle, left or right). The aim of this training phase was to  
380 strengthen the association between rewards and virtual beacons, and to train animals to navigate  
381 towards rewarded locations via appropriate rotations on top of the ball. This training phase also took  
382 three days, on average. During the third training phase mice were introduced into a virtual square  
383 arena placed in the middle of a larger virtual room (see Figures 1E and S1C). The virtual arena had  
384 size 60x60cm or 90cmx90cm for different mice. Reward beacons had a base of diameter that  
385 equalled to 10% of the arena width. Mice were trained on a 'random foraging' task, during which  
386 visible beacons were placed in the square box at random locations (at any given time only one  
387 beacon was visible).

388 The last training phase was the 'fading beacon' task. During this task, every fourth beacon occurred  
389 in a fixed location (the three intervening beacons being randomly placed within the square  
390 enclosure; see Figure S1D). At the beginning of this training phase the 'fixed location beacon' slowly  
391 faded from view over 10 contacts with decreasing opacity. The beacon would remain invisible as  
392 long as mice could find it, but would become visible again if mice could not locate it after 2 min of  
393 active searching. Once mice showed consistent navigation towards the fading fixed beacon, they  
394 were moved to the 'faded beacon' phase of the task where the 'fixed location beacon' was invisible  
395 from the start of the trial and remained invisible throughout the trial, with two drops of milk given as  
396 reward for contact. This trial phase therefore requires mice to navigate to an unmarked virtual  
397 location starting from different starting points (random locations where the 3<sup>rd</sup> visible beacon was  
398 placed). As such, the 'fading beacon' task serves like a continuous version of a Morris Water Maze  
399 task<sup>19</sup>, combining reference memory for an unmarked location with a foraging task designed to  
400 optimise environmental coverage for the assessment of spatial firing patterns. Mice typically  
401 experienced one trial per day.

## 402 Behavioural analyses

403 All training trials in the VR square and the real (R, see Screening for spatial cells) square  
404 environments from the 11 mice were included in the behavioural analyses. During

405 electrophysiological recording in R, the mouse's position and head orientation were tracked by an  
406 overhead camera (50Hz sampling rate) using two infra-red LEDs attached to the micro-drive at a  
407 fixed angle and spacing (5 cm apart). Brief losses of LED data due to cable obstruction were  
408 corrected with linear interpolation between known position values. Interpolation was carried out for  
409 each LED separately. The position values for each LED were then smoothed, separately, using a  
410 400ms boxcar filter. During electrophysiological recording in VR, head orientation was tracked as in  
411 R, the path, running speed and running direction was inferred from the VR log at 50Hz (movements  
412 of VR location being driven by the computer mice tracking the rotation of the ball, see above).

413 Path excess ratio was defined as the ratio between the length of the actual path that an animal takes  
414 to run from one reward location to another, and the distance between the two reward locations.

## 415 Screening for spatial cells

416 Following recovery, mice were food restricted to 85% of their free-feeding body weight. They were  
417 then exposed to a recording arena every day (20 mins per day) and screening for neural activity took  
418 place. The recording arena was a 60x60cm square box placed on a black Trespa 'Toplab' surface  
419 (Trespa International B.V., Weert, Netherlands), and surrounded by a circular set of black curtains. A  
420 white cue-card (A0, 84 x 119 cm), illuminated by a 40 W lamp, was the only directionally polarising  
421 cue within the black curtains. Milk (SMA Wysoy) was delivered as drops on the floor from a syringe  
422 as rewards to encourage foraging behaviour. Tetrodes were lowered by 62.5 um each day, until grid  
423 or place cell activity was identified, in dmEC or CA1 respectively. Neural activity was recorded using  
424 DACQ (Axona Ltd., UK) while animals were foraging in the square environment. For further details  
425 see<sup>2</sup>.

## 426 Recording spatial cell activity

427 Each recording session consisted of at least one 40-min random-foraging trial in a virtual square  
428 environment (see above for behavioural training). For 7 mice the virtual environment had size  
429 60x60cm and for 4 mice 90x90cm when recording took place. After one (or more) 40-min random  
430 foraging trials in the virtual square, mice were placed in a real-world square (60x60cm square,  
431 similar to the screening environment, see above) for a 20-min random-foraging trial in real world.

432 Additionally, 4 mice also underwent a virtual cue rotation experiment, which consisted of two 40-  
433 min random-foraging VR trial (one baseline VR trial and one rotated VR trial) and one 20 min R trial.  
434 Two mice navigating 60x60 cm VR squares and two 90x90cm squares participated in this  
435 experiment. In the rotated VR trials, all cues in the virtual reality environment rotated 180 degrees  
436 compared to the baseline trial, as was the entry point mice were carried into the VR rig from.

## 437 Firing rate map construction and spatial cell classification

438 Spike sorting was performed offline using an automated clustering algorithm (KlustaKwik<sup>20</sup>) followed  
439 by a manual review and editing step using an interactive graphical tool (waveform, Daniel Manson,  
440 <http://d1manson.github.io/waveform/>). After spike sorting, firing rate maps were constructed by  
441 binning animals' positions into 1.5 x 1.5cm bins, assigning spikes to each bin, smoothing both  
442 position maps and spike maps separately using a 5x5 boxcar filter, and finally dividing the smoothed  
443 spike maps by the smoothed position maps.

444 Cells were classified as place cells if their spatial information in baseline trials exceeded the 99<sup>th</sup>  
445 percentile of a 1000 shuffled distribution of spatial information scores calculated from rate maps  
446 where spike times were randomly offset relative to position by at least 4 sec. Cells were classified as

447 grid cells if their gridness scores in baseline trials exceeded the 99<sup>th</sup> percentile of a shuffled  
448 distribution of 1000 gridness scores<sup>21</sup>. Cells were classified as head direction cells if their Rayleigh  
449 vectors in baseline trials exceeded the threshold of the 99<sup>th</sup> percentile population shuffling.

450 Speed-modulated cells were classified from the general population of the recorded cells following<sup>22</sup>.  
451 Briefly, the degree of speed modulation for each cell was characterised by first defining the  
452 instantaneous firing rate of the cell as the number of spikes occurring in each position bin divided by  
453 the sampling duration (0.02s). Then a linear correlation was computed between the running speeds  
454 and firing rates across all position samples in a trial, and the resulting r-value was taken to  
455 characterise the degree of speed modulation for the cell. To be defined as speed-modulated, the r-  
456 value for a cell had to exceed the 99<sup>th</sup> percentile of a distribution of 1000 r-values obtained from  
457 spike shuffled data.

458 When assessing the directional modulation of place and grid cell firing (Figures 3 and 4), apparent  
459 directional modulation can arise in binned firing rate data from heterogenous sampling of directions  
460 within the spatial firing field<sup>23,24</sup>. Accordingly we fit a joint ('pxd') model of combined place and  
461 directional modulation to the data (maximising the likelihood of the data<sup>24</sup>) and perform analyses on  
462 the directional model in addition to the binned firing rate data.

## 463 **Acknowledgements**

464 We acknowledge support from the Wellcome Trust, European Union's Horizon 2020 research and  
465 innovation programme (grant agreement No. 720270), Biotechnology and Biological Sciences  
466 Research Council, European Research Council and China Scholarship Council, and technical help from  
467 Peter Bryan, Duncan Farquharson and Daniel Manson.

468

## 469 **Supplementary Figures**

470 *Supplementary Video – example of a mouse performing the 'fading beacon' task.*

471

Figure S1. Example paths in the three training stages and the recording stage.

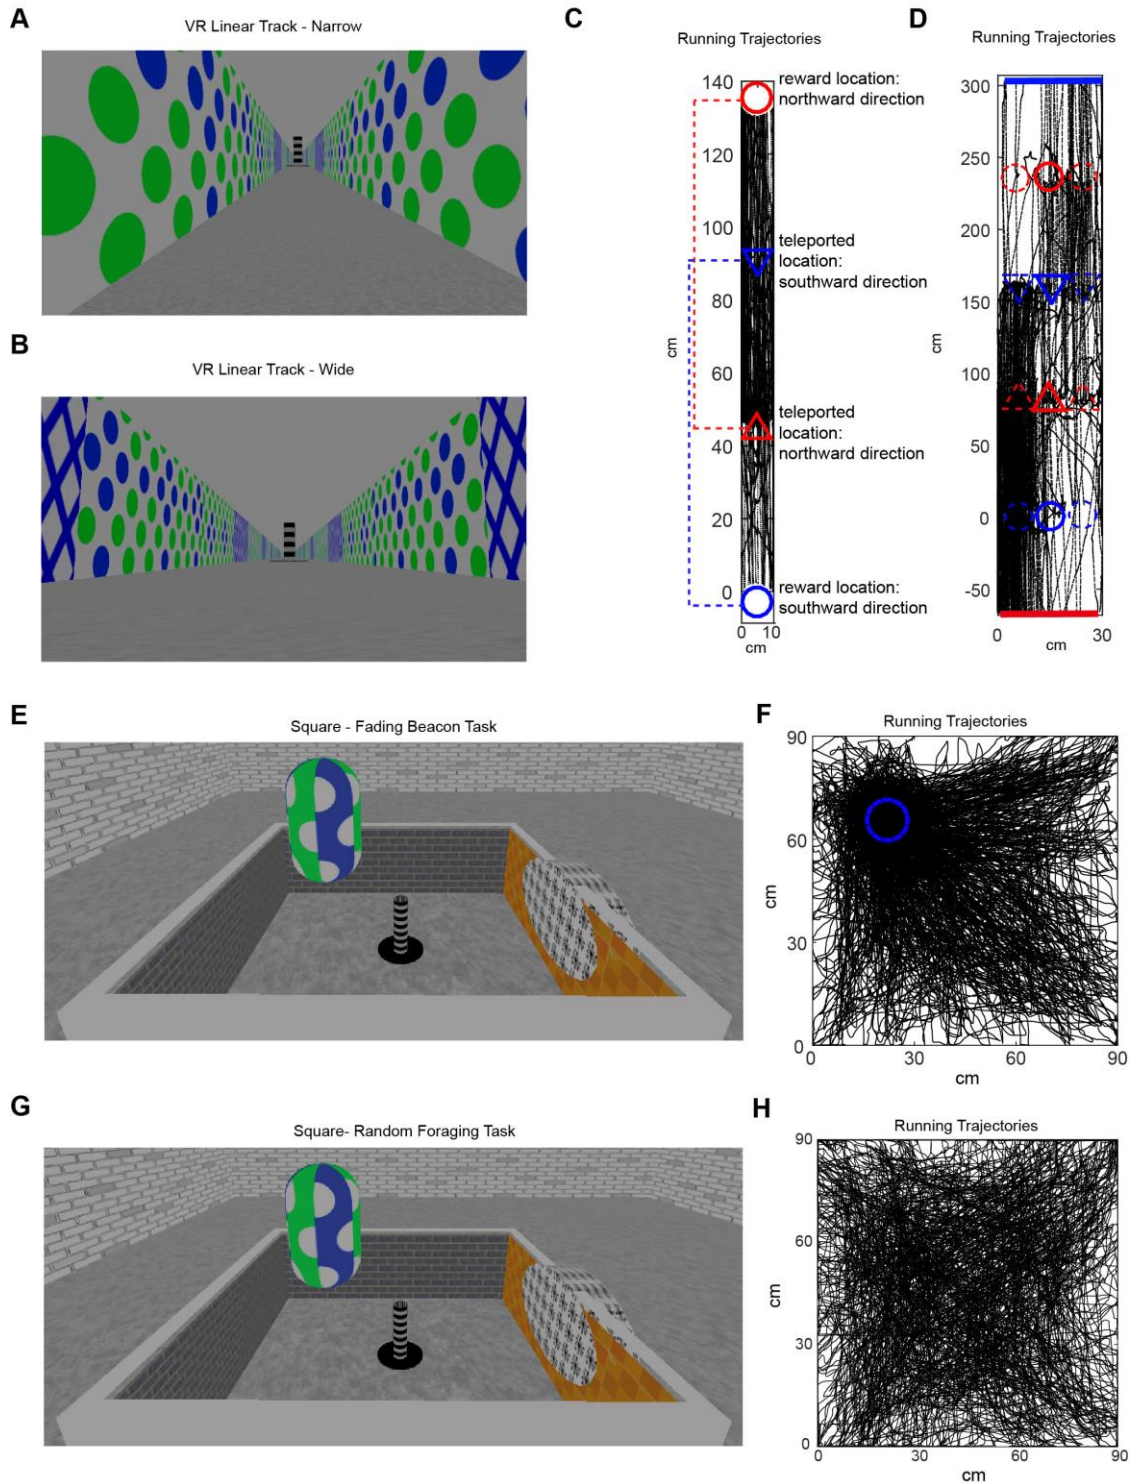

472

473 *Figure S1. Example paths in the three training stages and the recording stage. (A) A view of the VR*  
 474 *narrow linear track at training stage 1. (B) A view of the VR wide linear track at training stage 2. (C)*  
 475 *An example running trajectory in the narrow linear track. Circles indicate reward locations, triangles*  
 476 *indicate start points where animals get teleported after getting rewards. The start points were*  
 477 *associated with the reward positions with matching colours (dotted lines). For example, a mouse*  
 478 *gets teleported back to the position indicated by the blue triangle from the reward position indicated*  
 479 *by the blue circle. (D) An example running trajectory in the wide linear track. Circles indicate reward*



480 *locations, bars indicate end points of the track, triangles indicate start points where animals get*  
481 *teleported after getting rewards or reaching the ends of the track. (E) A view of the virtual square at*  
482 *training stage 3 – the ‘fading beacon’ task. (F) An example trajectory when a mouse performing a*  
483 *‘fading beacon’ task in the VR square. The dotted blue circle indicates the fixed location of every 4<sup>th</sup>*  
484 *reward. (G) A view of the virtual square during the recording stage – random foraging. (H) An*  
485 *example trajectory from a mouse foraging for randomly-positioned rewards in the VR square.*  
486

Figure S2. Directional polar plots of running

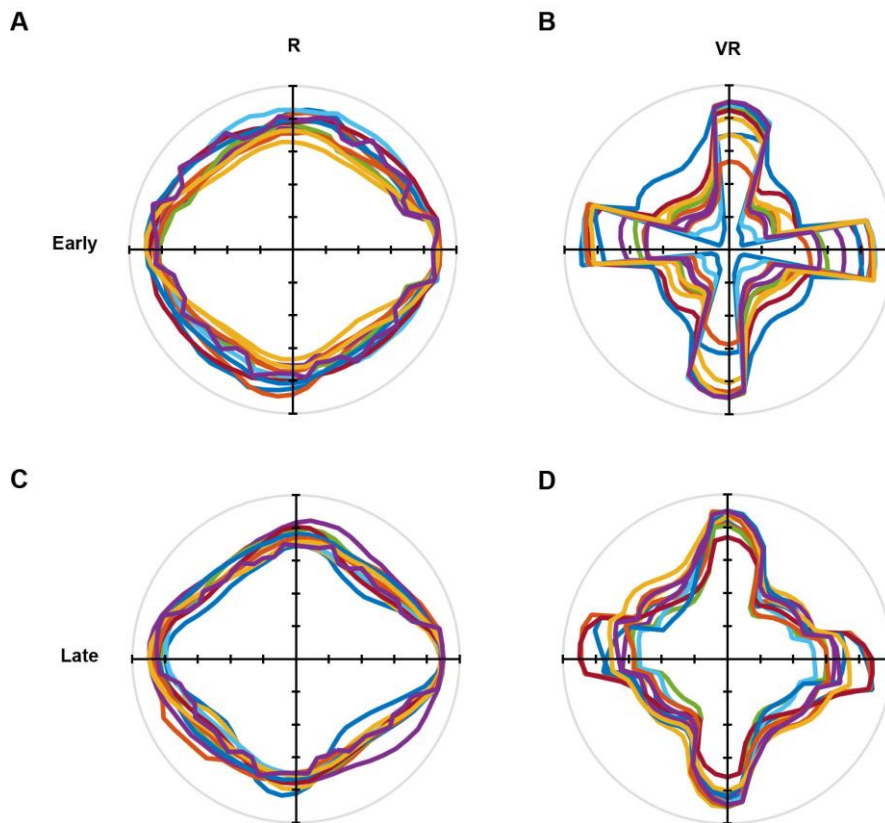

487  
488 *Figure S2. Directional polar plots of running directions (n=11 mice). (A-B) Average trajectories over*  
489 *the first 5 training trials in R (left column) and VR (right column). (C-D) Average trajectories over last*  
490 *5 training trials in R (left column) and VR (right column). Each colour represents one animal.*

Figure S3. Directional information of place cell firing

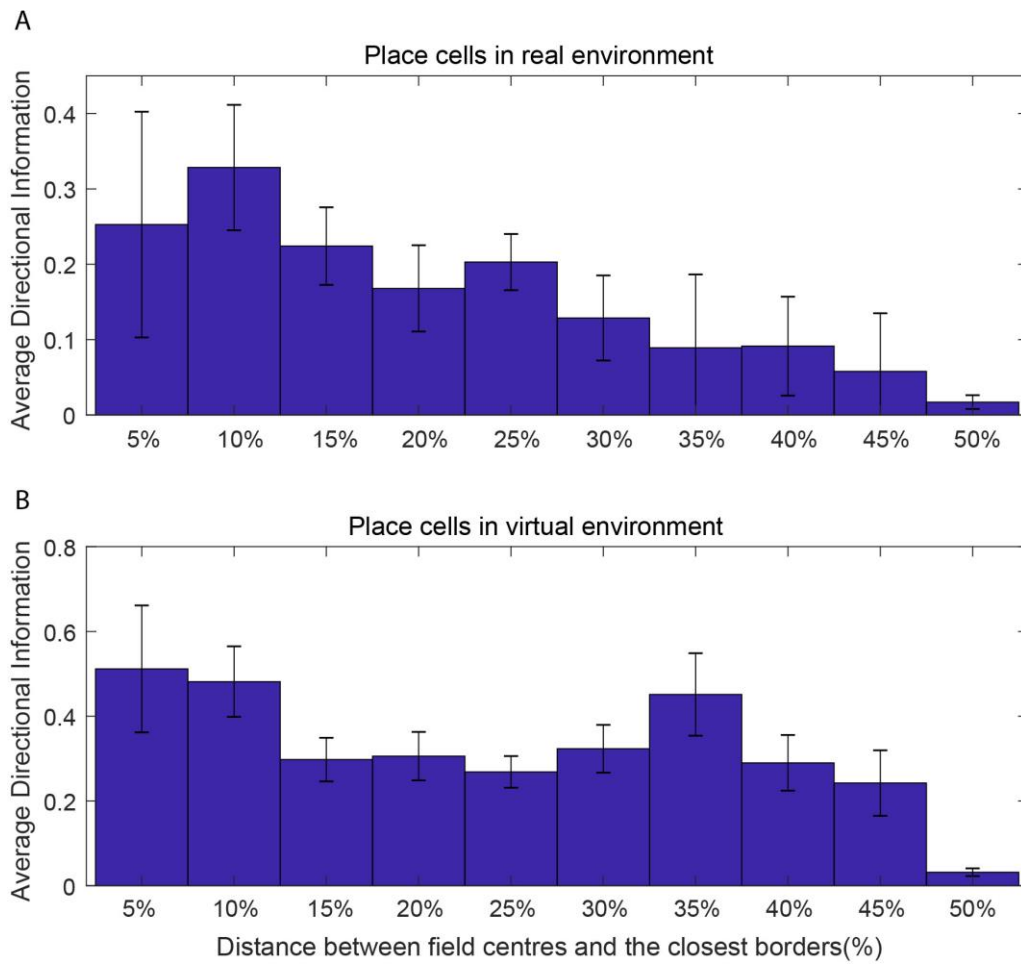

491

492 *Figure S3. Directional information of place cell firing (bits/spike) as a function of the distance from*  
493 *the nearest wall (as % of the width of environment) in real (A) and virtual (B) environments.*

Figure S4. Eleven head direction cells recorded in dmEC.

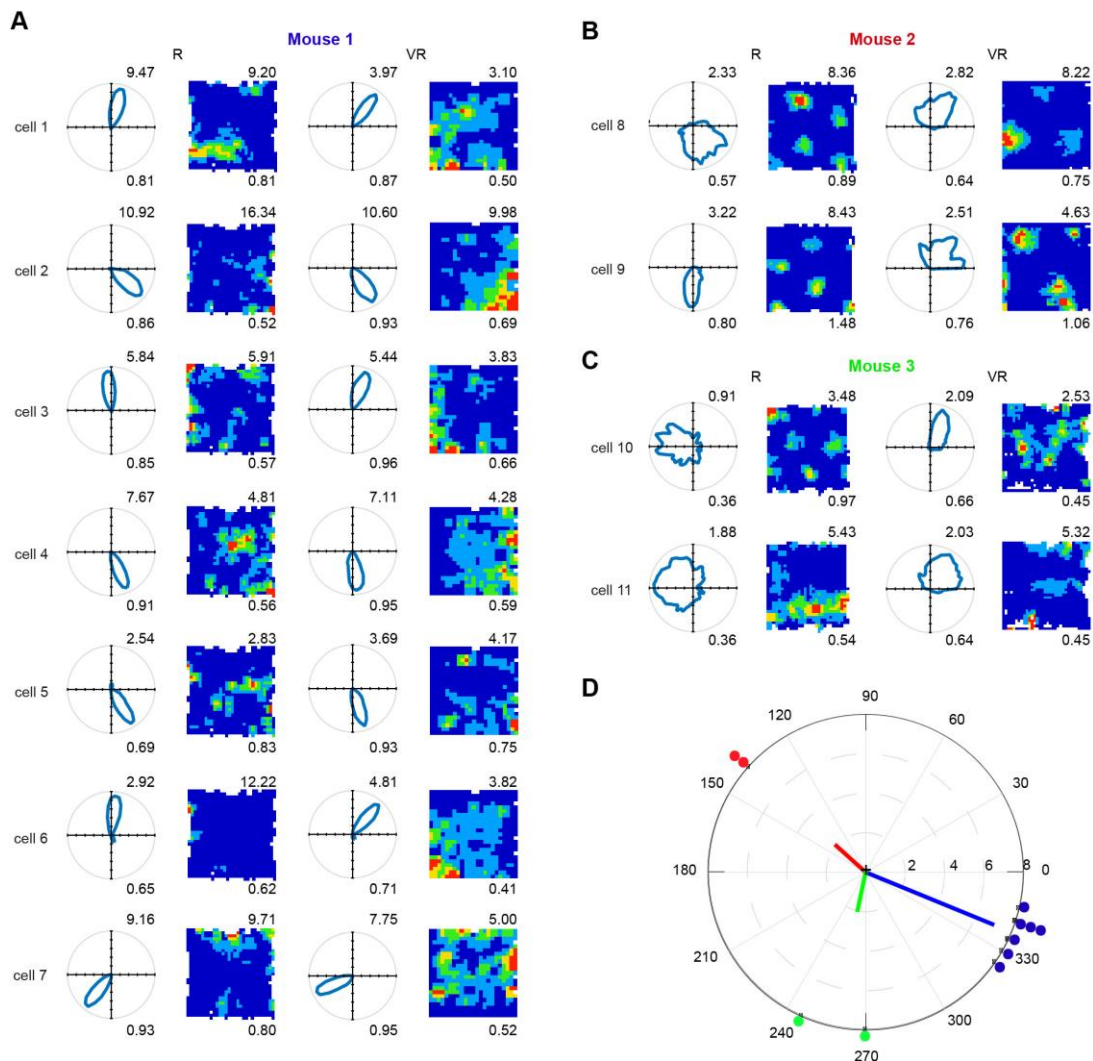

494

495 *Figure S4. Eleven head direction cells recorded in dmEC. (A) Polar plots (left column) and firing rate*  
 496 *maps (right column) of seven cells found in mouse 1. (B) Two conjunctive grid cells found in mouse 2.*  
 497 *(C) Two cells found in mouse 3. Numbers on the top right show maximum firing rates, and on the*  
 498 *bottom show Rayleigh vector length (left columns) and spatial information (right columns). (D) The*  
 499 *relative directional tuning difference of simultaneously recorded head-direction cells between VR and*  
 500 *R: Mouse 1 (blue),  $337.71 \pm 8.28$ ; Mouse 2 (red),  $138.0 \pm 0.00$ ; Mouse 3 (green),  $258.00 \pm 16.97$ . The dots*  
 501 *represent the relative directional tuning difference of individual cells between VR and R. The lines*  
 502 *represent the mean tuning difference within the animals. Each dot represents one cell, and each*  
 503 *colour represents one animal.*

## 504 Reference

- 505 1 Tcheang, L., Bulthoff, H. H. & Burgess, N. Visual influence on path integration in darkness  
506 indicates a multimodal representation of large-scale space. *Proc Natl Acad Sci U S A* **108**,  
507 1152-1157, doi:10.1073/pnas.1011843108 (2011).
- 508 2 Chen, G., King, J. A., Burgess, N. & O'Keefe, J. How vision and movement combine in the  
509 hippocampal place code. *Proc Natl Acad Sci U S A* **110**, 378-383,  
510 doi:10.1073/pnas.1215834110 (2013).
- 511 3 Dombeck, D. A., Harvey, C.D., Tian, L., Looger, L.L. & Tank, D. W. Functional imaging of  
512 hippocampal place cells at cellular resolution during virtual navigation. *Nature Neuroscience*  
513 **13**, 1433-1440 doi:10.1038/nn.2648 (2010)..
- 514 4 Harvey, C. D., Collman, F., Dombeck, D. A. & Tank, D. W. Intracellular dynamics of  
515 hippocampal place cells during virtual navigation. *Nature* **461**, 941-946,  
516 doi:10.1038/nature08499 (2009).
- 517 5 Royer, S., Zemelman, B. V., Losonczy, A., Kim, J., Chance, F., Magee, J.C. & Buzsaki, G. Control  
518 of timing, rate and bursts of hippocampal place cells by dendritic and somatic inhibition. *Nat*  
519 *Neurosci* **15**, 769-775, doi:10.1038/nn.3077 (2012).
- 520 6 Domnisoru, C., Kinkhabwala, A. A. & Tank, D. W. Membrane potential dynamics of grid cells.  
521 *Nature* **495**, 199-204, doi:10.1038/nature11973 (2013).
- 522 7 Schmidt-Hieber, C. & Haussler, M. Cellular mechanisms of spatial navigation in the medial  
523 entorhinal cortex. *Nat Neurosci* **16**, 325-331, doi:10.1038/nn.3340 (2013).
- 524 8 Heys, J. G., Rangarajan, K. V. & Dombeck, D. A. The functional micro-organization of grid cells  
525 revealed by cellular-resolution imaging. *Neuron* **84**, 1079-1090,  
526 doi:10.1016/j.neuron.2014.10.048 (2014).
- 527 9 Low, R. J., Gu, Y. & Tank, D. W. Cellular resolution optical access to brain regions in fissures:  
528 imaging medial prefrontal cortex and grid cells in entorhinal cortex. *Proc Natl Acad Sci U S A*  
529 **111**, 18739-18744, doi:10.1073/pnas.1421753111 (2014).
- 530 10 Villette, V., Malvache, A., Tressard, T., Dupuy, N. & Cossart, R. Internally recurring  
531 hippocampal sequences as a population template of spatiotemporal information. *Neuron* **88**,  
532 357-366, doi:10.1016/j.neuron.2015.09.052 (2015).
- 533 11 Danielson, N. B., Zaremba, J. D., Kaifosh, P., Bowler, J., Ladow, M., & Losonczy, A. Sublayer-  
534 Specific Coding Dynamics during Spatial Navigation and Learning in Hippocampal Area CA1.  
535 *Neuron* **91**, 652-665, doi:10.1016/j.neuron.2016.06.020 (2016).
- 536 12 Cohen, J. D., Bolstad, M. & Lee, A. K. Experience-dependent shaping of hippocampal CA1  
537 intracellular activity in novel and familiar environments. *Elife* **6**, doi:10.7554/eLife.23040  
538 (2017).
- 539 13 Minderer, M., Harvey, C. D., Donato, F. & Moser, E. I. Neuroscience: Virtual reality explored.  
540 *Nature* **533**, 324-325, doi:10.1038/nature17899 (2016).
- 541 14 Ravassard, P. *et al.* Multisensory control of hippocampal spatiotemporal selectivity. *Science*  
542 **340**, 1342-1346, doi:10.1126/science.1232655 (2013).
- 543 15 Acharya, L., Aghajan, Z. M., Vuong, C., Moore, J. J. & Mehta, M. R. Causal Influence of Visual  
544 Cues on Hippocampal Directional Selectivity. *Cell* **164**, 197-207,  
545 doi:10.1016/j.cell.2015.12.015 (2016).
- 546 16 Aghajan, Z. M. *et al.* Impaired spatial selectivity and intact phase precession in two-  
547 dimensional virtual reality. *Nat Neurosci* **18**, 121-128, doi:10.1038/nn.3884 (2015).
- 548 17 Aronov, D. & Tank, D. W. Engagement of neural circuits underlying 2D spatial navigation in a  
549 rodent virtual reality system. *Neuron* **84**, 442-456, doi:10.1016/j.neuron.2014.08.042 (2014).
- 550 18 Holscher, C., Schnee, A., Dahmen, H., Setia, L. & Mallot, H. A. Rats are able to navigate in  
551 virtual environments. *J Exp Biol* **208**, 561-569, doi:10.1242/jeb.01371 (2005).
- 552 19 Morris, R. G., Garrud, P., Rawlins, J. N. & O'Keefe, J. Place navigation impaired in rats with  
553 hippocampal lesions. *Nature* **297**, 681-683 (1982).

- 554 20 Kadir, S. N., Goodman, D. F. & Harris, K. D. High-dimensional cluster analysis with the  
555 masked EM algorithm. *Neural Comput* **26**, 2379-2394, doi:10.1162/NECO\_a\_00661 (2014).
- 556 21 Sargolini, F. *et al.* Conjunctive representation of position, direction, and velocity in  
557 entorhinal cortex. *Science* **312**, 758-762, doi:10.1126/science.1125572 (2006).
- 558 22 Kropff, E., Carmichael, J. E., Moser, M. B. & Moser, E. I. Speed cells in the medial entorhinal  
559 cortex. *Nature* **523**, 419-424, doi:10.1038/nature14622 (2015).
- 560 23 Muller, R. U., Bostock, E., Taube, J. S. & Kubie, J. L. On the directional firing properties of  
561 hippocampal place cells. *J Neurosci* **14**, 7235-7251 (1994).
- 562 24 Burgess, N., Cacucci, F., Lever, C. & O'Keefe, J. Characterizing multiple independent  
563 behavioral correlates of cell firing in freely moving animals. *Hippocampus* **15**, 149-153,  
564 doi:10.1002/hipo.20058 (2005).
- 565 25 Fyhn, M., Hafting, T., Witter, M. P., Moser, E. I. & Moser, M. B. Grid cells in mice.  
566 *Hippocampus* **18**, 1230-1238, doi:10.1002/hipo.20472 (2008).
- 567 26 McNaughton, B. L., Barnes, C. A. & O'Keefe, J. The contributions of position, direction, and  
568 velocity to single unit activity in the hippocampus of freely-moving rats. *Exp Brain Res* **52**, 41-  
569 49 (1983).
- 570 27 McFarland, W. L., Teitelbaum, H. & Hedges, E. K. Relationship between hippocampal theta  
571 activity and running speed in the rat. *J Comp Physiol Psychol* **88**, 324-328 (1975).
- 572 28 Rivas, J., Gaztelu, J. M. & Garcia-Austt, E. Changes in hippocampal cell discharge patterns  
573 and theta rhythm spectral properties as a function of walking velocity in the guinea pig. *Exp*  
574 *Brain Res* **108**, 113-118 (1996).
- 575 29 Slawinska, U. & Kasicki, S. The frequency of rat's hippocampal theta rhythm is related to the  
576 speed of locomotion. *Brain Res* **796**, 327-331 (1998).
- 577 30 Russell, N. A., Horii, A., Smith, P. F., Darlington, C. L. & Bilkey, D. K. Lesions of the vestibular  
578 system disrupt hippocampal theta rhythm in the rat. *J Neurophysiol* **96**, 4-14,  
579 doi:10.1152/jn.00953.2005 (2006).
- 580 31 Towse, B. W., Barry, C., Bush, D. & Burgess, N. Optimal configurations of spatial scale for grid  
581 cell firing under noise and uncertainty. *Philos Trans R Soc Lond B Biol Sci* **369**, 20130290,  
582 doi:10.1098/rstb.2013.0290 (2014).

583
